# Supplementary material for: Cultivation of Nitrifying and Nitrifying-Denitrifying Aerobic Granular Sludge for Sidestream Treatment of Anaerobically Digested Sludge Centrate
Source: MDPI journal article supplement (doi:10.3390/pr10091687), 2022-08-25
Supplement: s1 [file s1]

## Electronic Supplementary Material

### Aerobic granular sludge sequencing batch reactors (AGS-SBRs) performance summary

S1: Performance summary of AGS-SBR-1

| Parameters                         | Units                        | Period      |             |             |             |             |
|------------------------------------|------------------------------|-------------|-------------|-------------|-------------|-------------|
|                                    |                              | I           | II          | III         | IV          | V           |
| Operating Duration                 | d                            | 1 - 61      | 71 - 99     | 106 - 120   | 134-155     | 162 - 183   |
| Cycle Time                         | hrs                          | 6           | 6           | 4           | 4           | 4           |
| HRT                                | hrs                          | 12          | 12          | 8           | 8           | 8           |
| SRT                                | d                            | 31 ± 17     | 23 ± 9      | 32 ± 21     | 14 ± 8      | 13 ± 9      |
| <i>Mixed Liquor</i>                |                              |             |             |             |             |             |
| MLSS                               | g/L                          | 3 ± 1       | 2 ± 0.8     | 3 ± 0.1     | 2 ± 1       | 2 ± 1       |
| MLVSS                              | g/L                          | 2 ± 0.7     | 2 ± 0.6     | 2 ± 0.2     | 2 ± 0.5     | 2 ± 0.4     |
| MLVSS/MLSS Ratio                   | -                            | 0.73 ± 0.07 | 0.73 ± 0.04 | 0.81 ± 0.03 | 0.71 ± 0.17 | 0.70 ± 0.12 |
| <i>Influent</i>                    |                              |             |             |             |             |             |
| NH <sub>3</sub> -N                 | mg/L                         | 123 ± 5     | 180 ± 17    | 182 ± 9     | 255 ± 7     | 292 ± 11    |
| Alkalinity (as CaCO <sub>3</sub> ) | mg/L                         | 485 ± 2     | 815 ± 109   | 850 ± 109   | 1027 ± 103  | 1088 ± 98   |
| <i>Effluent</i>                    |                              |             |             |             |             |             |
| NH <sub>3</sub> -N                 | mg/L                         | 0.9 ± 2     | 5 ± 6       | 0.8 ± 00    | 29.6 ± 00   | 8 ± 7       |
| NO <sub>2</sub> -N                 | mg/L                         | 97 ± 49     | 185 ± 8     | 196 ± 10    | 200 ± 00    | 49 ± 6      |
| NO <sub>3</sub> -N                 | mg/L                         | 26 ± 45     | <0.2        | <0.2        | 15 ± 00     | 245 ± 27    |
| Alkalinity (as CaCO <sub>3</sub> ) | mg/L                         | 41 ± 25     | 66 ± 52     | 101 ± 15    | 154 ± 00    | 98 ± 53     |
| TSS                                | mg/L                         | 48 ± 14     | 59 ± 21     | 37 ± 17     | 65 ± 18     | 61 ± 9      |
| VSS                                | mg/L                         | 31 ± 10     | 41 ± 16     | 25 ± 12     | 50 ± 16     | 43 ± 4      |
| NH <sub>3</sub> -N removal         | %                            | 96 ± 11     | 97 ± 4      | 100 ± 00    | 49 ± 55     | 97 ± 2      |
| NH <sub>3</sub> -N Loading         | g/L.d                        | 0.3 ± 0.01  | 0.4 ± 0.03  | 0.6 ± 0.03  | 0.8 ± 0.02  | 0.9 ± 0.03  |
| Nitrite Accumulation Rate (NAR)    | %                            | 23 ± 36     | <0.2        | <0.2        | 15 ± 12     | 83 ± 00     |
| Ammonia Removal Rate               | mg NH <sub>4</sub> -N/L.h    | 24 ± 3      | 36 ± 4      | 57 ± 3      | 39 ± 43     | 90 ± 1      |
| Specific Ammonia Removal Rate      | mg NH <sub>4</sub> -N/gVSS.h | 13 ± 6      | 22 ± 8      | 26 ± 3      | 37 ± 37     | 58 ± 13     |

S2: Performance summary of AGS-SBR-2

| Parameters                         | Units                        | Period      |             |             |
|------------------------------------|------------------------------|-------------|-------------|-------------|
|                                    |                              | I           | II          | III         |
| Operating Duration                 | d                            | 1 - 14      | 24 - 51     | 58 - 72     |
| Cycle Time                         | hrs                          | 6           | 6           | 4           |
| HRT                                | hrs                          | 12          | 12          | 8           |
| SRT                                | d                            | 26 ± 0.05   | 25 ± 6      | 10 ± 2      |
| <i>Mixed Liquor</i>                |                              |             |             |             |
| MLSS                               | g/L                          | 4 ± 2       | 3 ± 0.6     | 3 ± 0.1     |
| MLVSS                              | g/L                          | 3 ± 1       | 2 ± 0.4     | 2 ± 0.1     |
| MLVSS/MLSS Ratio                   | -                            | 0.71 ± 0.02 | 0.64 ± 0.05 | 0.64 ± 0.02 |
| <i>Influent</i>                    |                              |             |             |             |
| NH <sub>3</sub> -N                 | mg/L                         | 84 ± 2      | 187 ± 7     | 192 ± 13    |
| Alkalinity (as CaCO <sub>3</sub> ) | mg/L                         | 747 ± 25    | 858 ± 158   | 828 ± 26    |
| <i>Effluent</i>                    |                              |             |             |             |
| NH <sub>3</sub> -N                 | mg/L                         | <0.02       | 18 ± 38     | 0.43 ± 0.38 |
| NO <sub>2</sub> -N                 | mg/L                         | <0.02       | 0.06 ± 0.06 | 0.94 ± 1    |
| NO <sub>3</sub> -N                 | mg/L                         | 83 ± 3      | 166 ± 42    | 184 ± 4     |
| Alkalinity (as CaCO <sub>3</sub> ) | mg/L                         | 143 ± 5     | 138 ± 126   | 157 ± 13    |
| TSS                                | g/L                          | 0.07 ± 0.03 | 0.06 ± 0.02 | 0.09 ± 0.02 |
| VSS                                | g/L                          | 0.05 ± 0.01 | 0.03 ± 0.01 | 0.04 ± 0.01 |
| NH <sub>3</sub> -N removal         | %                            | 100 ± 00    | 90 ± 21     | 100 ± 00    |
| NH <sub>3</sub> -N Loading         | g/L.d                        |             |             |             |
| Nitrite Accumulation Rate (NAR)    | %                            | <0.2        | <0.2        | 1% ± 00     |
| Ammonia Removal Rate               | mg NH <sub>4</sub> -N/L.h    | 17 ± 0.43   | 35 ± 9      | 60 ± 4      |
| Specific Ammonia Removal Rate      | mg NH <sub>4</sub> -N/gVSS.h | 7 ± 3       | 18 ± 5      | 35 ± 4      |

S3: Performance summary of AGS-SBR-3

| Parameters                                  | Units | Period      |             |             |             |             |             |             |
|---------------------------------------------|-------|-------------|-------------|-------------|-------------|-------------|-------------|-------------|
|                                             |       | I           | II          | III         | IV          | V           |             |             |
| Operating Duration                          | d     | 1 - 38      | 38 - 72     | 79 - 93     | 100 - 114   | 121 - 135   | 149 - 156   | 163 - 212   |
| Cycle Time                                  | h     | 6           | 4           | 4           | 4           | 4           | 4           | 4           |
| HRT                                         | h     | 12          | 8           | 8           | 8           | 8           | 8           | 8           |
| SRT                                         | d     | 59 ± 19     | 22 ± 10     | 16 ± 5      | 42 ± 40     | 58 ± 26     | 130 ± 8     | 109 ± 55    |
| <i>Mixed Liquor</i>                         |       |             |             |             |             |             |             |             |
| MLSS                                        | g/L   | 7 ± 1       | 7 ± 2       | 7 ± 0.6     | 7 ± 0.6     | 8 ± 1       | 12 ± 0.1    | 9 ± 1       |
| MLVSS                                       | g/L   | 6 ± 1       | 6 ± 2       | 6 ± 0.4     | 6 ± 0.5     | 8 ± 1       | 11 ± 0.2    | 8 ± 1       |
| MLVSS/MLSS Ratio                            | -     | 0.85 ± 0.03 | 0.89 ± 0.02 | 0.89 ± 0.02 | 0.9 ± 0.01  | 0.91 ± 0.00 | 0.91 ± 0.01 | 0.89 ± 0.03 |
| <i>Influent</i>                             |       |             |             |             |             |             |             |             |
| NH <sub>3</sub> -N                          | mg/L  | 77 ± 12     | 88 ± 3      | 84 ± 2      | 74 ± 11     | 149 ± 7     | 131 ± 00    | 121 ± 5     |
| sCOD                                        | mg/L  | 2.09 ± 0.15 | 2.20 ± 0.07 | 1.52 ± 0.01 | 0.95 ± 0.06 | 0.72 ± 0.05 | 0.54 ± 0.06 | 1.39 ± 0.05 |
| Phosphorus (PO <sub>4</sub> <sup>3-</sup> ) | mg/L  | 21 ± 2      | 21 ± 1      | 19 ± 5      | 21 ± 0.08   | 36 ± 20     | 37 ± 3      | 46 ± 17     |
| Alkalinity (as CaCO <sub>3</sub> )          | mg/L  | 444 ± 217   | 242 ± 86    | 309 ± 34    | 1096 ± 103  | 1274 ± 85   | 1710 ± 28   | 1758 ± 141  |
| <i>Effluent</i>                             |       |             |             |             |             |             |             |             |
| NH <sub>3</sub> -N                          | mg/L  | 9 ± 6       | 16 ± 3      | 8 ± 11      | 0.4 ± 0.6   | 0.5 ± 0.6   | 0.1 ± 0.2   | 2 ± 1.55    |
| NO <sub>2</sub> -N                          | mg/L  | 3 ± 4       | 3 ± 0.9     | 7 ± 2       | 6 ± 5       | 0.1 ± 0.2   | 0.04 ± 0.05 | 3 ± 3       |
| NO <sub>3</sub> -N                          | mg/L  | 3 ± 2       | 0.6 ± 0.2   | 2 ± 0.5     | 8 ± 4       | 121 ± 19    | 104 ± 2     | 33 ± 23     |
| sCOD                                        | mg/L  | 93 ± 70     | 35 ± 12     | 41 ± 14     | 58 ± 26     | 53 ± 21     | 89 ± 12     | 128 ± 34    |
| Phosphorus (PO <sub>4</sub> <sup>3-</sup> ) | mg/L  | 5 ± 3       | 2 ± 2       | 7 ± 2       | 4 ± 0.4     | 33 ± 16     | 26 ± 3      | 38 ± 12     |
| Alkalinity (as CaCO <sub>3</sub> )          | mg/L  | 72 ± 37     | 120 ± 77    | 72 ± 12     | 178 ± 142   | 79 ± 47     | 122 ± 38    | 201 ± 145   |
| TSS                                         | g/L   | 0.07 ± 0.03 | 0.10 ± 0.02 | 0.16 ± 0.03 | 0.09 ± 0.06 | 0.05 ± 0.02 | 0.03 ± 0.00 | 0.04 ± 0.02 |
| VSS                                         | g/L   | 0.06 ± 0.02 | 0.07 ± 0.02 | 0.12 ± 0.03 | 0.07 ± 0.06 | 0.04 ± 0.02 | 0.01 ± 0.00 | 0.05 ± 0.08 |

|                                                             |                               |             |             |             |             |             |             |             |
|-------------------------------------------------------------|-------------------------------|-------------|-------------|-------------|-------------|-------------|-------------|-------------|
| NH <sub>3</sub> -N Removal                                  | %                             | 88 ± 8      | 81 ± 3      | 91 ± 12     | 100 ± 1     | 100 ± 00    | 100 ± 00    | 98 ± 1      |
| sCOD Removal                                                | %                             | 95 ± 4      | 98 ± 1      | 97 ± 1      | 94 ± 2      | 93 ± 3      | 84 ± 00     | 91 ± 2      |
| Phosphorus (PO <sub>4</sub> <sup>3-</sup> ) Removal         | %                             | 79 ± 14     | 93 ± 10     | 66 ± 2      | 79 ± 2      | 26 ± 9      | 31 ± 14     | 15 ± 5      |
| NH <sub>3</sub> -N Loading                                  | g/L.d                         | 0.15 ± 0.02 | 0.17 ± 0.01 | 0.17 ± 0.00 | 0.15 ± 0.02 | 0.30 ± 0.01 | 0.26 ± 0.00 | 0.24 ± 0.01 |
| COD/N Ratio                                                 | mg sCOD/mg NH <sub>3</sub> -N | 27 ± 3      | 25 ± 1      | 18 ± 0.32   | 13 ± 1      | 5 ± 0.43    | 4 ± 0.46    | 12 ± 0.47   |
| F/M                                                         | gCOD/gVSS.h                   | 0.71 ± 0.10 | 1 ± 0.37    | 0.72 ± 0.05 | 0.40 ± 0.03 | 0.26 ± 0.02 | 0.14 ± 0.02 | 0.45 ± 0.06 |
| Organic Loading Rate                                        | gCOD/L.d                      | 4 ± 0.4     | 7 ± 0.2     | 5 ± 0.02    | 3 ± 0.2     | 2 ± 0.1     | 2 ± 0.2     | 4 ± 0.2     |
| Simultaneous Nitrification-Denitrification (SND) Efficiency | %                             | 92 ± 6      | 95 ± 1      | 89 ± 4      | 81 ± 8      | 18 ± 16     | 21 ± 2      | 70 ± 17     |

---
